# Supplementary material for: Unprecedented multiphonon vibronic transitions of erbium ions on copper nanoparticle-containing tellurite glasses
Source: Royal Society of Chemistry journal article supplement (doi:10.1039/d0cp01690j), 2020-01-01
Supplement: d0cp01690j1.pdf [file d0cp01690j1.pdf]

## Unprecedented multiphonon vibronic transitions of erbium ions on copper nanoparticles-containing tellurite glasses

Tamires Martinhão Machado<sup>a\*</sup>, Rodrigo Ferreira Falci<sup>b</sup>, Gustavo F. S. Andrade<sup>a</sup>, Maria José Valenzuela Bell<sup>b</sup>, Maurício Antonio Pereira da Silva<sup>a</sup>.

\*Corresponding Author

\*Corresponding author. Tel: +55-21-3527-1248; Fax: 55-21-3527-1236;

E-mail address: tamires.martinhao@ice.ufjf.br

### SUPPLEMENTARY MATERIAL

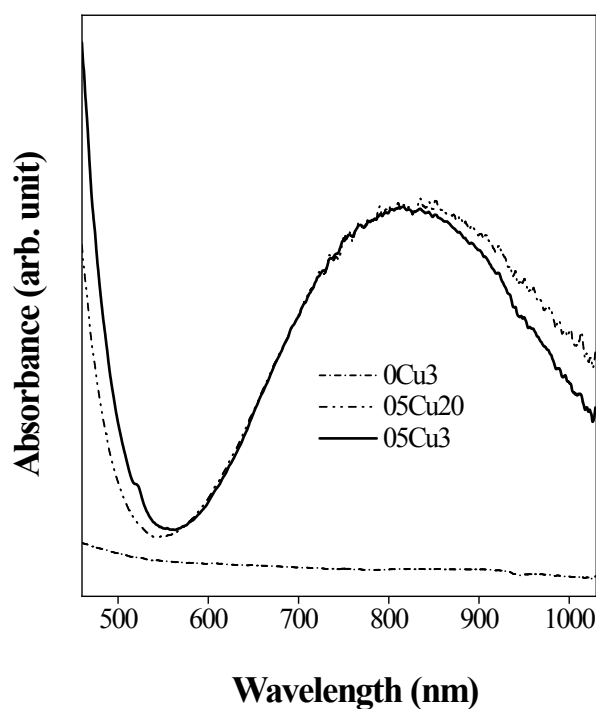

Figure S1:

A further evidence of the influence of copper can be observed in the shift of the optical absorption edge to lower energies when copper is added. This is an evidence of polarizability change. The lowest optical absorption edge where observed for the sample with CuNP, where the highest R value was observed. The higher optical absorption edge occurred for the sample without copper and this sample presented the lower R value
